# Supplementary material
Source: HighWire-hosted journal article supplement (https://bmjopen.bmj.com/content/10/8/e031672)
Supplement: inline-supplementary-material-1 [file inline-supplementary-material-1.pdf]

My search through MIDLINE (OVID).

- 1- Select resource(s) to search > All resources > OK.
- 2- In search information > Change the dates to starts on 1991. (if to be done again, a limit to April 2019 should be added).
- 3- Start typing the words on this order.

Database: Ovid MEDLINE(R) <1946 to April 2019>

Search Strategy:

-----  
 Database: Marianjoy Books@Ovid, Marianjoy Full Text Journals@Ovid, Joanna Briggs Institute EBP Database - <Current to December 19, 2019>, EBM Reviews - ACP Journal Club <1991 to November 2019>, EBM Reviews - Cochrane Central Register of Controlled Trials <November 2019>, EBM Reviews - Cochrane Database of Systematic Reviews <2005 to December 27, 2019>, EBM Reviews - Cochrane Clinical Answers <November 2019>, EBM Reviews - Cochrane Methodology Register <3rd Quarter 2012>, EBM Reviews - Database of Abstracts of Reviews of Effects <1st Quarter 2016>, EBM Reviews - Health Technology Assessment <4th Quarter 2016>, EBM Reviews - NHS Economic Evaluation Database <1st Quarter 2016>, Ovid MEDLINE(R) and Epub Ahead of Print, In-Process & Other Non-Indexed Citations, Daily and Versions(R) <1946 to December 30, 2019>, Journals@Ovid Database  
 Search Strategy:  
 -----

- 1 chronic fatigue syndrome.tw. (15453)
- 2 chronic fatigue syndrome. (15591)
- 3 myalgic encephalomyelitis.tw. (1759)
- 4 myalgic encephalomyelitis. (1814)
- 5 CFS.tw. (14612)
- 6 CFS. (14658)
- 7 myalgic encephalopathy.tw. (117)
- 8 myalgic encephalopathy. (121)
- 9 1 or 2 or 3 or 4 or 5 or 6 or 7 or 8 (24300)
- 10 Magnetic Resonance Imaging. (900322)
- 11 Magnetic Resonance Imaging.tw. (602884)
- 12 mri.tw. (705066)
- 13 mri. (713965)
- 14 structural mri.tw. (14058)
- 15 structural mri. (14367)
- 16 functional mri.tw. (37868)
- 17 functional mri. (38928)
- 18 fMRI.tw. (100820)
- 19 fMRI. (105395)
- 20 functional magnetic resonance imaging. (70511)
- 21 functional magnetic resonance imaging.tw. (67927)
- 22 resting state functional magnetic resonance imaging.tw. (4840)
- 23 resting state functional magnetic resonance imaging. (4972)
- 24 resting-state functional magnetic resonance imaging. (4972)
- 25 resting-state functional magnetic resonance imaging.tw. (4840)
- 26 resting-state functional MRI. (3364)
- 27 resting-state functional MRI.tw. (3227)
- 28 resting state functional MRI. (3364)
- 29 resting state functional MRI.tw. (3227)
- 30 resting-state fMRI. (9394)
- 31 resting-state fMRI.tw. (8547)
- 32 resting state fMRI. (9394)
- 33 resting state fMRI.tw. (8547)
- 34 rsfMRI. (864)
- 35 rsfMRI.tw. (842)
- 36 rs-fMRI. (2847)
- 37 rs-fMRI.tw. (2777)
- 38 10 or 11 or 12 or 13 or 14 or 15 or 16 or 17 or 18 or 19 or 20 or 21 or 22 or 23 or 24 or 25 or 26 or 27 or 28 or 29 or 30 or 31 or 32 or 33 or 34 or 35 or 36 or 37 (1227699)
- 39 9 and 38 (1816)

\*\*\*\*\*
